# Supplementary material
Source: PubMed Central journal article supplement (PMC8029301)

**A** *TUNEL*

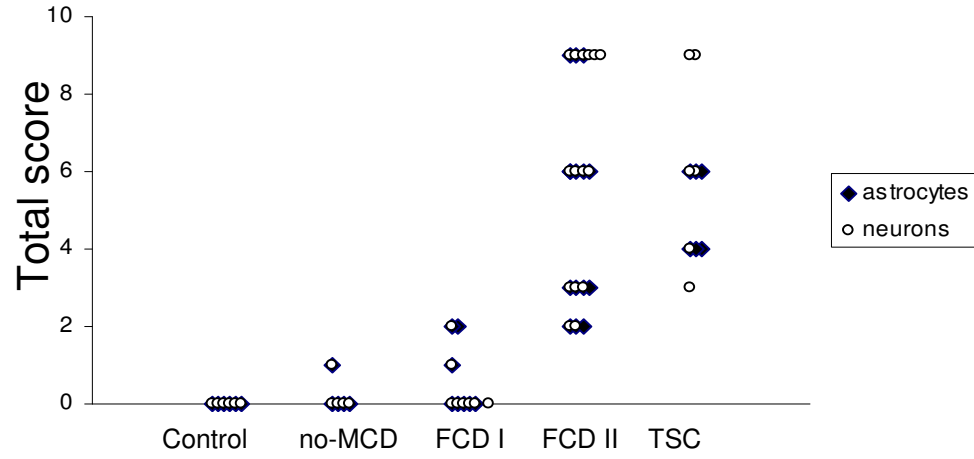

**B** *Caspase-3*

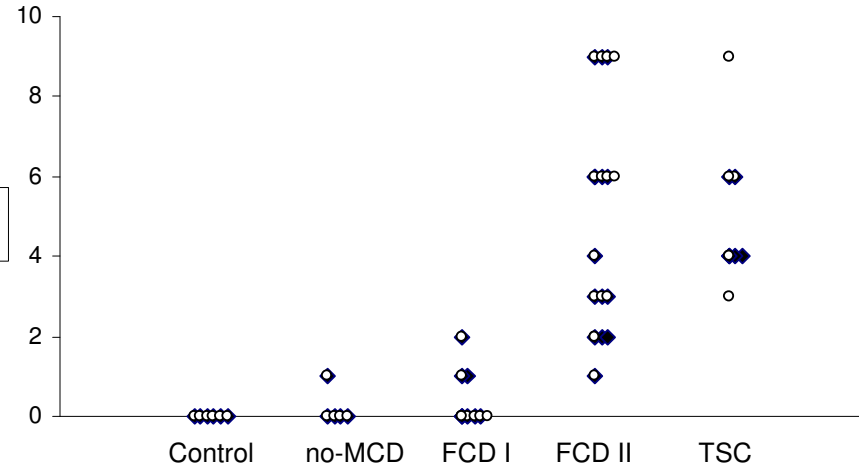

**C** *Caspase-6*

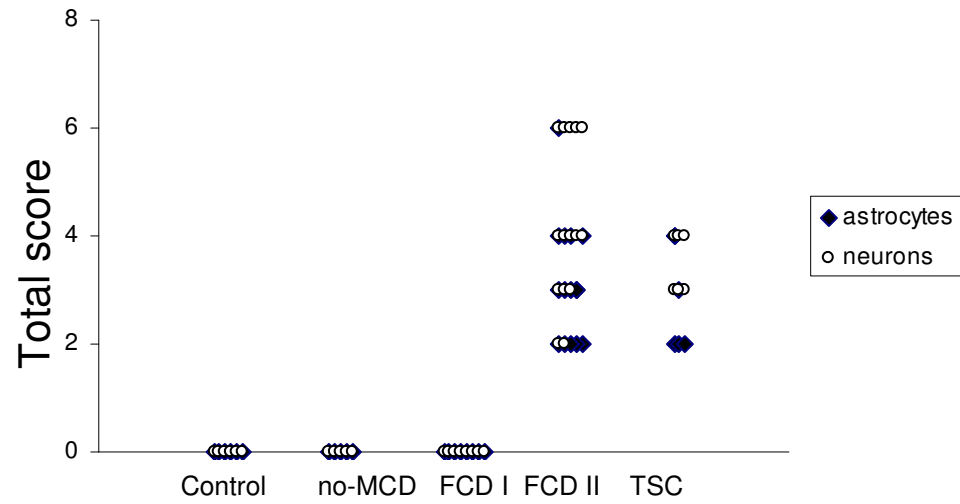

Supplement: BPA-24-1-s002.pdf [file BPA-24-1-s002.pdf]
